# Supplementary material for: Probing the reactivity of 2,2-diphenyl-1-picrylhydrazyl (DPPH) with metal cations and acids in acetonitrile by electrochemistry and UV-Vis spectroscopy
Source: Royal Society of Chemistry journal article supplement (doi:10.1039/d2cp05296b), 2023-01-01
Supplement: d2cp05296b1.pdf [file d2cp05296b1.pdf]

## Probing the reactivity of DPPH with metal cations and acids in acetonitrile by electrochemistry and UV-Vis spectroscopy

Yannick Nguemaleu,<sup>a</sup> Arlette Danelle Djitieu Deutchoua,<sup>a,b</sup> Sarrah Sonita Pougoue Hanga,  
<sup>a</sup> Liendji Wendji Rossel,<sup>a</sup> Gustave Kenne Dedzo,<sup>a\*</sup> Emmanuel Ngameni<sup>a</sup>

<sup>a</sup> Laboratory of Analytical Chemistry, Faculty of Sciences, University of Yaoundé I, B. P. 812 Yaoundé, Cameroon

<sup>b</sup> Department of Transformation and Quality Control of Fisheries Products, Institute of Fisheries and Aquatic Sciences at Yabassi, University of Douala, B. P. 7236 Douala, Cameroon

\* e-mail: kennegusto@yahoo.fr

### Supplementary Information

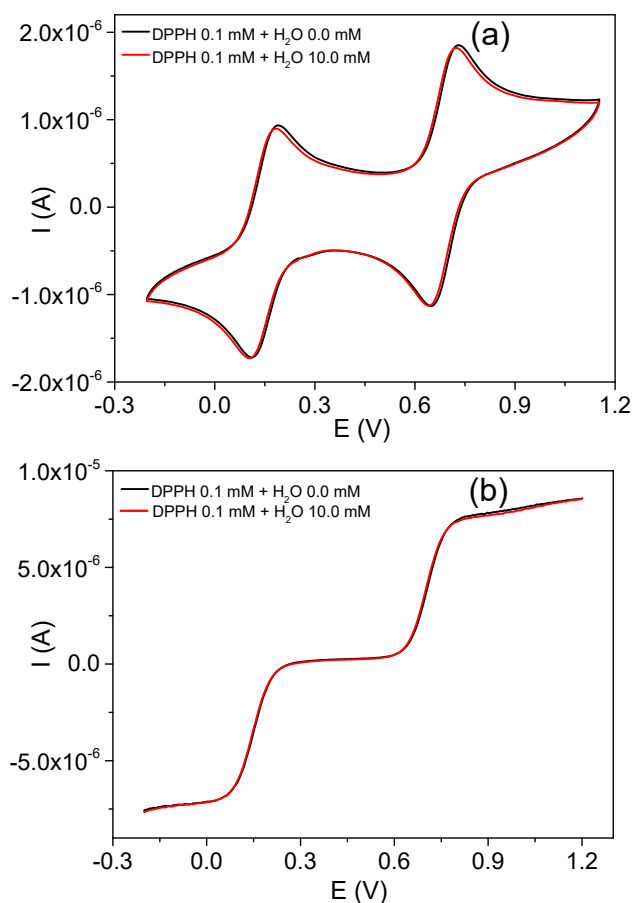

Figure S01. (a) Cyclic voltammogram and (b) linear sweep voltammograms at rotating electrodes (900 rpm) of DPPH 0.1 mM at glassy carbon electrode at  $50 \text{ mV s}^{-1}$  in TBAHFP 0.03 M acetonitrile solution without and with 10 mM of water.
